# Supplementary material for: Human FBXL8 Is a Novel E3 Ligase Which Promotes BRCA Metastasis by Stimulating Pro-Tumorigenic Cytokines and Inhibiting Tumor Suppressors
Source: Cancers (Basel). 2020 Aug 7;12(8):2210. doi: 10.3390/cancers12082210 (PMC7465060; doi:10.3390/cancers12082210)
Supplement: Supplementary file 1 [file cancers-12-02210-s001.pdf]

## Supplementary Materials:

# Human FBXL8 Is a Novel E3 Ligase Which Promotes BRCA Metastasis by Stimulating Pro-Tumorigenic Cytokines and Inhibiting Tumor Suppressors

| Samples<br>Gene | Patient 1 |           | Patient 2 |           | Patient 3 |           | Patient 4 |           | Patient 5 |           |
|-----------------|-----------|-----------|-----------|-----------|-----------|-----------|-----------|-----------|-----------|-----------|
|                 | Normal    | Carcinoma |
| SKP1            | 579       | 594       | 598       | 873       | 473       | 571       | 365       | 269       | 540       | 643       |
| SKP2            | 16        | 35        | 11        | 30        | 11        | 15        | 19        | 21        | 15        | 31        |
| CUL1            | 45        | 72        | 80        | 112       | 75        | 68        | 78        | 96        | 42        | 79        |
| FBXW7           | 60        | 80        | 61        | 113       | 31        | 41        | 41        | 27        | 55        | 70        |
| SAG             | 48        | 81        | 54        | 77        | 43        | 32        | 44        | 68        | 44        | 73        |
| FBXO4           | 29        | 31        | 35        | 23        | 10        | 22        | 13        | 23        | 26        | 41        |
| RBX1            | 56        | 78        | 49        | 52        | 49        | 37        | 54        | 63        | 50        | 58        |

**Figure S1.** The up-regulation of key members of SCF components in BRCA tissues. Log<sub>2</sub>. fold change of SCF components identified from the global RNA sequencing. Key factors highlighted include: SKP1 (S-phase kinase-associated protein 1), SKP2, CUL1 (cullin 1), FBXW7 (F-box/WD repeat-containing protein 7), SAG (Sensitive to apoptosis gene), FBXO4 (F-box only protein 4) and RBX1 (ring-box 1). The significant actions of SCF components overexpression in breast carcinoma tissues are shown in red. Numbers in red indicate increase in expression of the gene (log<sub>2</sub> fold change) in BRCA tissues.

| Patient          | 6    | 7    | 8    | 9    | 10   | 11   | 12   | 13   | 14   | 15   | 16     | 17   | 18   | 19   | 20   |
|------------------|------|------|------|------|------|------|------|------|------|------|--------|------|------|------|------|
| Diagnosis        | IDC  | IDC  | ILC  | IDC  | IDC  | IDC  | IDC  | ILC  | IDC  | IDC  | IDC    | IDC  | IDC  | MC   | IDC  |
| Histologic type  | DCIS | IMC  | DCIS | IMC  | IMC  | IMC  | IMC  | IMC  | IDC  | IDC  | IDC    | IMC  | IDC  | MC   | IDC  |
| Histologic grade | 3    | 3    | 3    | 1    | 1    | 2    | 2    | 2    | 1    | 2    | 3      | 2    | 2    | 1    | 1    |
| pT               | Tis  | T1   | T1b  | T1   | T1c  | T1a  | T1   | T1c  | T1b  | T1c  | T1c    | T2   | T1c  | T1b  | T1c  |
| pN               | N0     | N0   | N0   | N0   | N0   |
| pM               | M0     | M0   | M0   | M0   | M0   |
| Stage            | 0    | IA     | IA   | IA   | IA   | IA   |
| ER               | -    | +    | -    | +    | +    | -    | +    | +    | +    | +    | -      | -    | +    | +    | +    |
| PR               | +    | +    | +    | +    | +    | -    | -    | +    | +    | +    | -      | -    | +    | +    | -    |
| HER2             | 3+   | 2+   | 3+   | 2+   | 2+   | 3+   | 3+   | 2+   | 1+   | 2+   | 2+     | 1+   | 1+   | 1+   | 2+   |
| Ki67             | NA   | 10%  | NA   | 15%  | 5%   | 10%  | 25%  | 15%  | 10%  | 60%  | 30%    | 50%  | 60%  | 3%   | 10%  |
| Age (year)       | 50   | 57   | 48   | 62   | 53   | 68   | 45   | 70   | 41   | 43   | 55     | 50   | 51   | 56   | 50   |
| Gender (F/M)     | F    | F    | F    | F    | F    | F    | F    | F    | F    | F    | F      | F    | F    | F    | F    |
| FBXL8 Tumor (fc) | 1.9? | 0.1? | 2.1? | 2.2? | 1.3? | 0.5? | 1.5? | 1.9? | 0.5? | 1.8? | <0.01? | 0.4? | 1.6? | 1.5? | 1.5? |

| Patient          | 21               | 22               | 23               | 24                 | 25               | 26               | 27               | 28               | 29               |
|------------------|------------------|------------------|------------------|--------------------|------------------|------------------|------------------|------------------|------------------|
| Diagnosis        | ILC              | IDC              | IDC              | IDC                | IDC              | IDC              | IDC              | IDC              | IDC              |
| Histologic type  | ILC              | IMC              | IMC              | IMC                | IDC              | IDC              | IDC              | IDC              | MMC              |
| Histologic grade | 2                | 2                | 1                | 3                  | 2                | 2                | 2                | NA               | 1                |
| pT               | T2               | T2               | T2               | T1c                | T2               | T1c              | T1c              | T2               | T2               |
| pN               | N0               | N0               | N0               | N0                 | N0               | N1               | N1               | N1               | N1a              |
| pM               | M0               | M0               | M0               | M0                 | M0               | M0               | M0               | M0               | M0               |
| Stage            | IIA              | IIA              | IIA              | IIA                | IIA              | IIA              | IIA              | IIB              | IIB              |
| ER               | +                | +                | -                | +                  | +                | -                | +                | -                | +                |
| PR               | +                | +                | -                | +                  | +                | -                | +                | -                | +                |
| HER2             | 1+               | 1+               | 0                | 1+                 | 1+               | 1+               | 2+               | 3+               | 2+               |
| Ki67             | 15%              | 30%              | 3%               | 75%                | 30%              | 50%              | 20%              | 20%              | 10%              |
| Age (year)       | 62               | 49               | 65               | 66                 | 54               | 54               | 38               | 72               | 45               |
| Gender (F/M)     | F                | F                | F                | F                  | F                | F                | F                | F                | F                |
| FBXL8 Tumor (fc) | 1.9 <sup>?</sup> | 2.4 <sup>?</sup> | 2.4 <sup>?</sup> | <0.01 <sup>?</sup> | 3.3 <sup>?</sup> | 0.1 <sup>?</sup> | 1.1 <sup>?</sup> | 1.2 <sup>?</sup> | 2.5 <sup>?</sup> |

| Patient          | 30               | 31               | 32               | 33               | 34               | 35               | 36               | 37               |
|------------------|------------------|------------------|------------------|------------------|------------------|------------------|------------------|------------------|
| Diagnosis        | IDC              |
| Histologic type  | IMC              | IDC              | IDC              | IDC              | IMC              | IMC              | IMC              | IMC              |
| Histologic grade | 3                | 3                | 3                | 2                | 2                | 2                | 2                | 2                |
| pT               | T1c              | T3               | T2               | T1c              | T4b              | T4b              | T2               | T2               |
| pN               | N2a              | N1               | N2a              | N2a              | N2a              | N1a              | N3a              | N3a              |
| pM               | M0               | M1               | M0               | M0               | M0               | M0               | M0               | M0               |
| Stage            | IIIA             | IIIA             | IIIA             | IIIA             | IIIB             | IIIB             | IIIC             | IIIC             |
| ER               | +                | +                | -                | +                | +                | +                | +                | +                |
| PR               | +                | +                | -                | +                | +                | +                | +                | +                |
| HER2             | 3+               | 2+               | 3+               | 3+               | 1+               | 2+               | 1+               | 0                |
| Ki67             | 35%              | 80%              | 50%              | 40%              | 30%              | 30%              | 20%              | 10%              |
| Age (year)       | 44               | 51               | 42               | 50               | 49               | 63               | 56               | 42               |
| Gender (F/M)     | F                | F                | F                | F                | F                | F                | F                | F                |
| FBXL8 Tumor (fc) | 1.3 <sup>?</sup> | 1.9 <sup>?</sup> | 3.4 <sup>?</sup> | 1.1 <sup>?</sup> | 4.5 <sup>?</sup> | 3.1 <sup>?</sup> | 1.3 <sup>?</sup> | 0.7 <sup>?</sup> |

**Figure S2.** Clinicopathological parameters in paired primary breast carcinoma tissues. To affirm the RNA-seq data, we acquired more primary tissues for the qRT-PCR analysis. Clinicopathological information provided from TMUH, includes diagnosis, histological type, histological grade, pTNM Pathological Classification, stage, ER, PR, HER2, Ki67, age and gender in respective tissue. Paired primary tissues from breast carcinoma ( $n = 32$ ) and corresponding normal breast tissues ( $n = 32$ ) were examined. Tissue samples are categorized into three groups based on cancer staging. (A): 0/IA as initial stage ( $n = 30$ , including  $n = 15$  carcinoma tissues and  $n = 15$  corresponding normal breast tissues); (B): IIA/IIB as middle stage ( $n = 18$ , including  $n = 9$  carcinoma tissues and  $n = 9$  corresponding normal breast tissues) and (C): IIIA/IIIB/IIIC as late stage ( $n = 16$ , including  $n = 8$  carcinoma tissues and  $n = 8$  corresponding normal breast tissues). The mRNA levels (fold change) of FBXL8 are highlighted - red arrow ( $\uparrow$ ) and blue arrow ( $\downarrow$ ) indicate upregulation and downregulation, respectively, of the FBXL8 gene expression. F, female; IMC, Invasive mammary carcinoma; IDC, Invasive ductal carcinoma; ILC, Invasive lobular carcinoma; MC, Mucinous carcinoma; MMC, Mixed mucinous carcinoma; DCIS, Ductal carcinoma in situ; fc, fold change; ER, estrogen receptor; PR, progesterone receptor; pN, pathologic lymph node status; pT, Primary Tumour; pM, Distant Metastasis.

| Patient          | 38  | 39  | 40  | 41  | 42  | 43  | 44  | 45  | 46  |
|------------------|-----|-----|-----|-----|-----|-----|-----|-----|-----|
| Diagnosis        | IDC |
| Histologic type  | IDC |
| Histologic grade | 1   | 2   | 3   | 3   | 1   | 2   | 3   | 3   | 3   |
| pT               | T1c | T1b | T1c |
| pN               | N0  | N1  |
| pM               | M0  |
| Stage            | IA  | IB  |
| ER               | +   | -   | +   | +   | +   | +   | +   | -   | -   |
| PR               | +   | -   | -   | +   | +   | +   | -   | -   | -   |
| HER2             | 2+  | 0   | 2+  | 2+  | 2+  | 2+  | 3+  | 0   | 2+  |
| Ki67             | 10% | 25% | 15% | 10% | 15% | 50% | 20% | 70% | 10% |
| Age (year)       | 59  | 30  | 46  | 63  | 60  | 71  | 51  | 51  | 58  |
| Gender (F/M)     | F   | F   | F   | F   | F   | F   | F   | F   | F   |

| Patient          | 47  | 48  | 49  | 50  | 51  | 52  | 53  | 54  | 55  | 56  | 57  |
|------------------|-----|-----|-----|-----|-----|-----|-----|-----|-----|-----|-----|
| Diagnosis        | IDC |
| Histologic type  | IDC |
| Histologic grade | 2   | 3   | 3   | 3   | 2   | 1   | 2   | 3   | 2   | 2   | 3   |
| pT               | T2  | T2  | T1c | T2  | T2  | T1c | T2  | T2  | T2  | T2  | T2  |
| pN               | N0  | N0  | N1  | N0  | N0  | N1  | N1  | N1  | N1  | N1  | N1  |
| pM               | M0  |
| Stage            | IIA | IIA | IIA | IIA | IIA | IIA | IIB | IIB | IIB | IIB | IIB |
| ER               | -   | +   | -   | -   | -   | +   | +   | +   | +   | +   | -   |
| PR               | -   | +   | -   | -   | -   | -   | +   | +   | +   | +   | -   |
| HER2             | 1+  | 1+  | 3+  | 1+  | 0   | 1+  | 2+  | 0   | 1+  | 0   | 3+  |
| Ki67             | 25% | 40% | 40% | 50% | 75% | 5%  | 10% | 40% | 5%  | 5%  | 50% |
| Age (year)       | 60  | 39  | 46  | 56  | 51  | 48  | 66  | 80  | 51  | 51  | 56  |
| Gender (F/M)     | F   | F   | F   | F   | F   | F   | F   | F   | F   | F   | F   |

| Patient          | 58   | 59   | 60   | 61   | 62   | 63   | 64   | 65   | 66   | 67   |
|------------------|------|------|------|------|------|------|------|------|------|------|
| Diagnosis        | IDC  |
| Histologic type  | IDC  |
| Histologic grade | 2    | 2    | 3    | 3    | 3    | 2    | 2    | 2    | 3    | 3    |
| pT               | T3   | T2   | T2   | T3   | T2   | T2   | T2   | T2   | T3   | T3   |
| pN               | N2   | N2   | N1   | N2   |
| pM               | M0   |
| Stage            | IIIA |
| ER               | +    | +    | -    | -    | +    | +    | -    | +    | +    | +    |
| PR               | +    | +    | -    | -    | +    | +    | -    | +    | +    | +    |
| HER2             | 1+   | 3+   | 1+   | 0    | 2+   | 1+   | 0    | 0    | 2+   | 0    |
| Ki67             | 50%  | 65%  | 40%  | 60%  | 8%   | 20%  | 70%  | 30%  | 50%  | 30%  |
| Age (year)       | 42   | 57   | 74   | 50   | 72   | 38   | 72   | 51   | 34   | 70   |
| Gender (F/M)     | F    | F    | F    | F    | F    | F    | F    | F    | F    | F    |

**Figure S3.** Clinicopathological parameters in primary BRCA tissues used for IHC. analysis. To affirm the transcriptional data, we retrospectively studied primary breast tissues based on the IHC analysis. Clinicopathological information provided from TMUH, include diagnosis, histological type, histological grade, pTNM Pathological Classification, stage, ER, PR, HER2, Ki67, age and gender in respective tissues. A total 60 primary tissues were examined, constituting breast carcinoma ( $n = 30$ ) and paired normal breast tissues ( $n = 30$ ). Samples were categorized into three groups based on cancer staging. (A): IA/IB as initial stage ( $n = 18$ , including  $n = 9$  carcinoma tissues and  $n = 9$  normal breast tissues); (B): IIA/IIB as middle stage ( $n = 22$ , including  $n = 11$  carcinoma tissues and  $n = 11$  normal breast tissues) and (C): IIIA as late stage ( $n = 20$ , including  $n = 10$  carcinoma tissues

and  $n = 10$  normal breast tissues). The mRNA levels (fold change) of FBXL8 are highlighted here. Red arrow (↑) and blue arrow (↓) indicate upregulation and downregulation of FBXL8 gene expression, respectively. F, female; IMC, Invasive mammary carcinoma; IDC, Invasive ductal carcinoma; ILC, Invasive lobular carcinoma; MC, Mucinous carcinoma; MMC, Mixed mucinous carcinoma; DCIS, Ductal carcinoma in situ; fc, fold change; ER, estrogen receptor; PR, progesterone receptor; pN, pathologic lymph node status; pT, Primary Tumour; pM, Distant Metastasis.

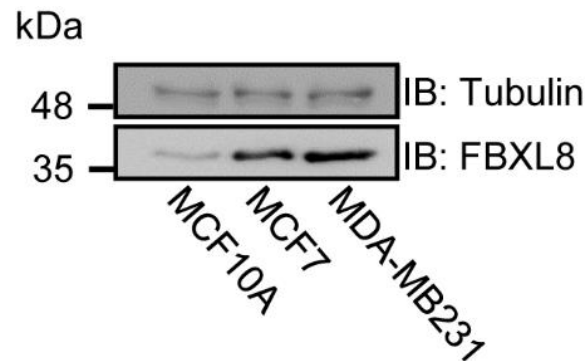

**Figure S4.** Endogenous levels of FBXL8 in BRCA cells and control MCF10A cells. The endogenous levels of FBXL8 protein were examined in MCF7 and MDA-MB231 cells. MCF10A, a non-carcinoma cell line, was also be examined. FBXL8 was highly-expressed in both MCF7 and MDA-MB231 cells. On the other hand, MCF10A cells only expressed low/basal level of FBXL8 compared to MCF7 and MDA-MB231 cells.

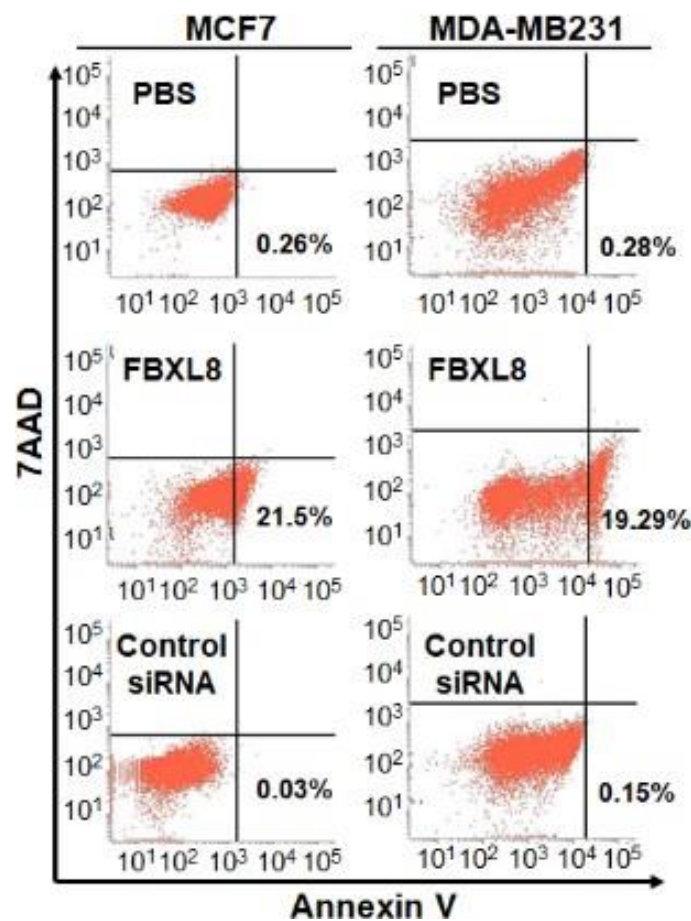

**Figure S5.** FACS analysis of apoptosis after siRNA transfection treatments of breast cancer cells. Representative histograms of cell apoptosis assay (Annexin V and 7AAD double staining), including

controls (PBS and control-siRNA). Two breast cancer cell lines are tested, including MCF7 and MDA-MB231. Early apoptotic cells are indicated by Annexin V<sup>+</sup>/7AAD<sup>-</sup> (shown as %).

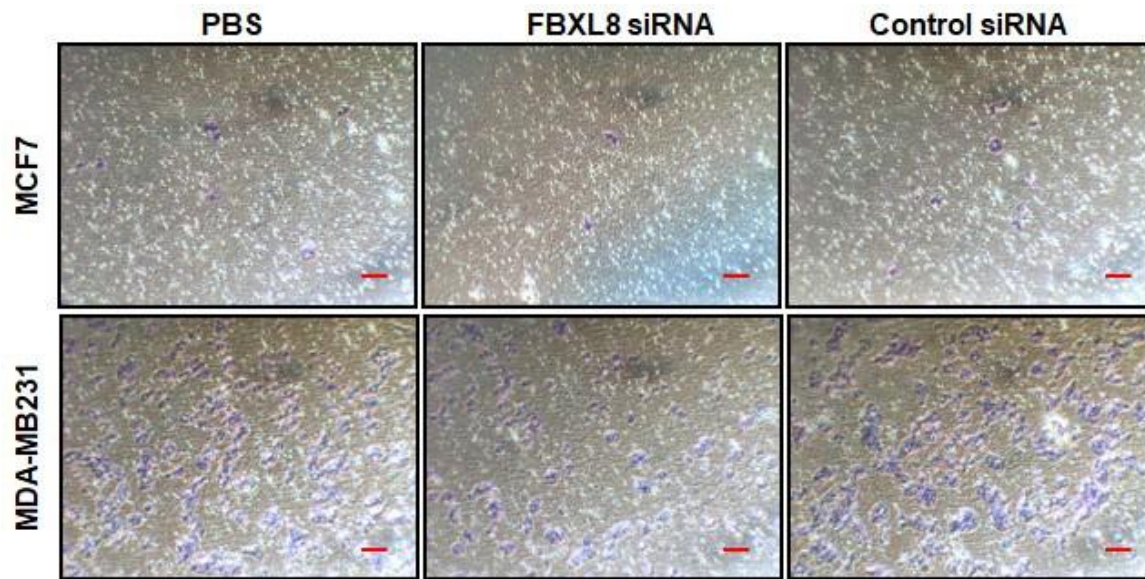

**Figure S6.** Representative microscopy images of breast cancer cell invasion. 24 h after treatment of breast cancer cells with FBXL8 siRNA, control siRNA or PBS control, matrigel invasion assay was performed. FBXL8 siRNA efficiently suppressed breast cancer invasion. Two breast cancer cell lines are tested, including MCF7, and MDA-MB231. After another 24h incubation, cells that had migrated from the upper to the lower side of the filter were imaged and counted with a light microscope (5 fields/filter). Scale bar is 100  $\mu$ m, shown as the red color line (—).

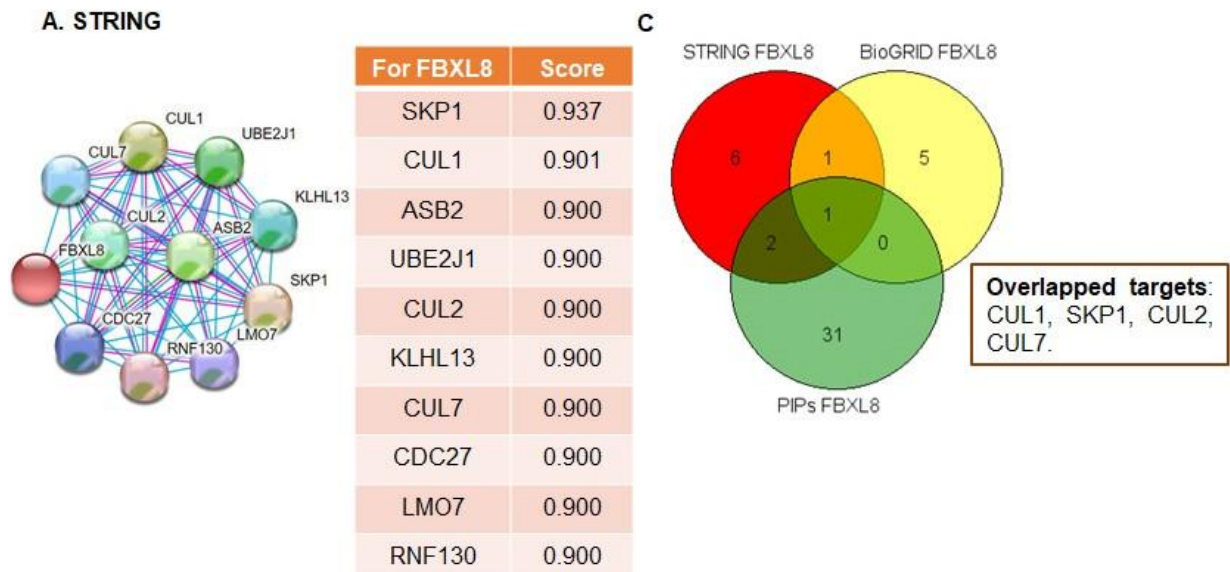

**B. BioGRID and PIPs**

| Database | Predicted targets                                                                                                                                                                                                                                                                                                     |
|----------|-----------------------------------------------------------------------------------------------------------------------------------------------------------------------------------------------------------------------------------------------------------------------------------------------------------------------|
| BioGRID  | <p>SCF E3-associated: SKP1, CUL1, UBE2M.</p> <p>DNA binding protein: ORC4, SNAI1.</p> <p>Others: HSP90AA1, CHMP6.</p>                                                                                                                                                                                                 |
| PIPs     | <p>SCF E3-associated: CUL2, PARC, CUL5, CUL1, CUL7, RNF8, RNF31, ANAPC2.</p> <p>DNA binding protein: SMAD1, SMAD2, SMAD3, SMAD4, IRF3, IRF5, IRF8, NBN.</p> <p>Cyclin family: CCNA2, CCNB1, CCNB2, CCND2, CCND3, CCNG1, CCNL1, CCNL2, CCNC, CCNF, CCNI, CCNH, CCNE1, CCNE2, C10orf9, CDKN2B.</p> <p>Others: CNT2.</p> |

**Figure S7.** Computer modeling prediction of FBXL8-associated proteins. Several database are used to search the potential proteins associated with FBXL8, including STRING, BioGRID and PIPs (**A**) shows predicted factors by STRING may involve in FBXL8-binding. (**B**) shows summarized list of FBXL8-binding proteins based on BioGRID and PIPs. (**C**) shows protein targets either present in any two database or in all three databases, including CUL1, SKP1, CUL2 and CUL7.

**Total lysates/Before IP**

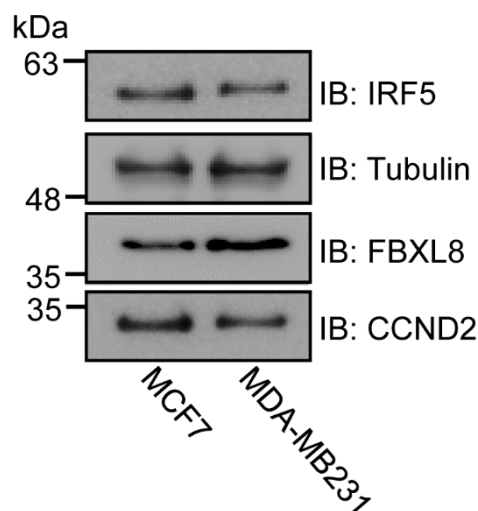

**Figure S8.** Immunoblotting analysis of whole lysates of BRCA cell. Western blot analysis of whole cell lysates shows the presence of IRF5, FBXL8, and CCND2 in the MCF7 and MDA-MB231 cells (before IP). Tubulin was used as a loading control.

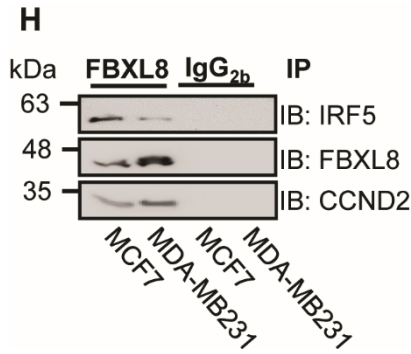

**Figure S9.** Original images of Figure 6H for blots.

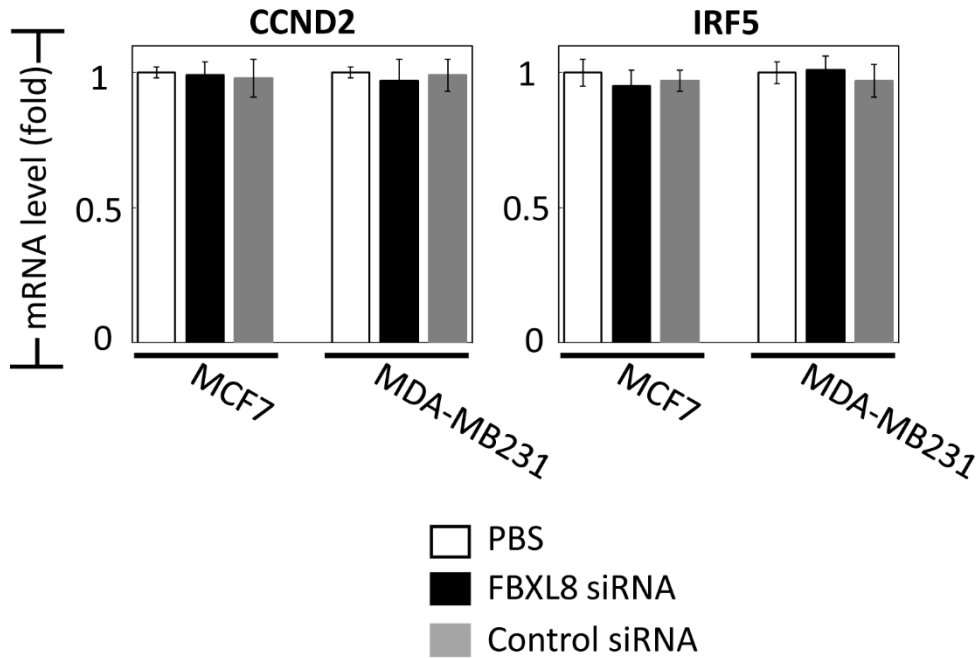

**Figure S10.** Transcript levels of CCND2 and IRF5 in BRCA cells upon knockdown of FBXL8 by siRNA treatment. 48 h after treatment of the MCF7 and MDA-MB231 cells with FBXL8-siRNA or control siRNAs, qRT-PCR was carried out to determine the mRNA levels of cancer suppressors, CCND2 and IRF5. The transcript levels of CCND2 and IRF5 remained unchanged when FBXL8 was knocked down. Data are presented as means  $\pm$ SD ( $n = 3$ ).

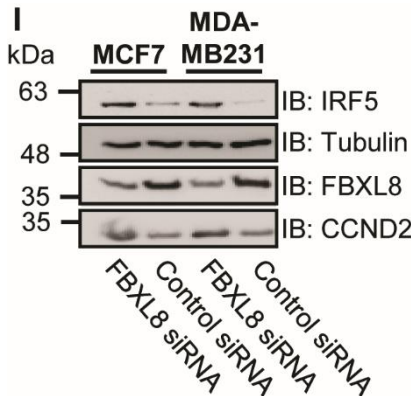

**Figure S11.** Original images of Figure 6I for blots.
